# Supplementary material for: Fabrication of Europium-Doped Barium Titanate/Polystyrene Polymer Nanocomposites Using Ultrasonication-Assisted Method: Structural and Optical Properties
Source: MDPI journal article supplement (doi:10.3390/polym14214664), 2022-11-01
Supplement: s1 [file s1]

## Supplementary data

### [Fabrication of Europium-Doped Barium Titanate/Polystyrene Polymer Nanocomposites Using Ultrasonication-Assisted Method: Structural and Optical Properties]

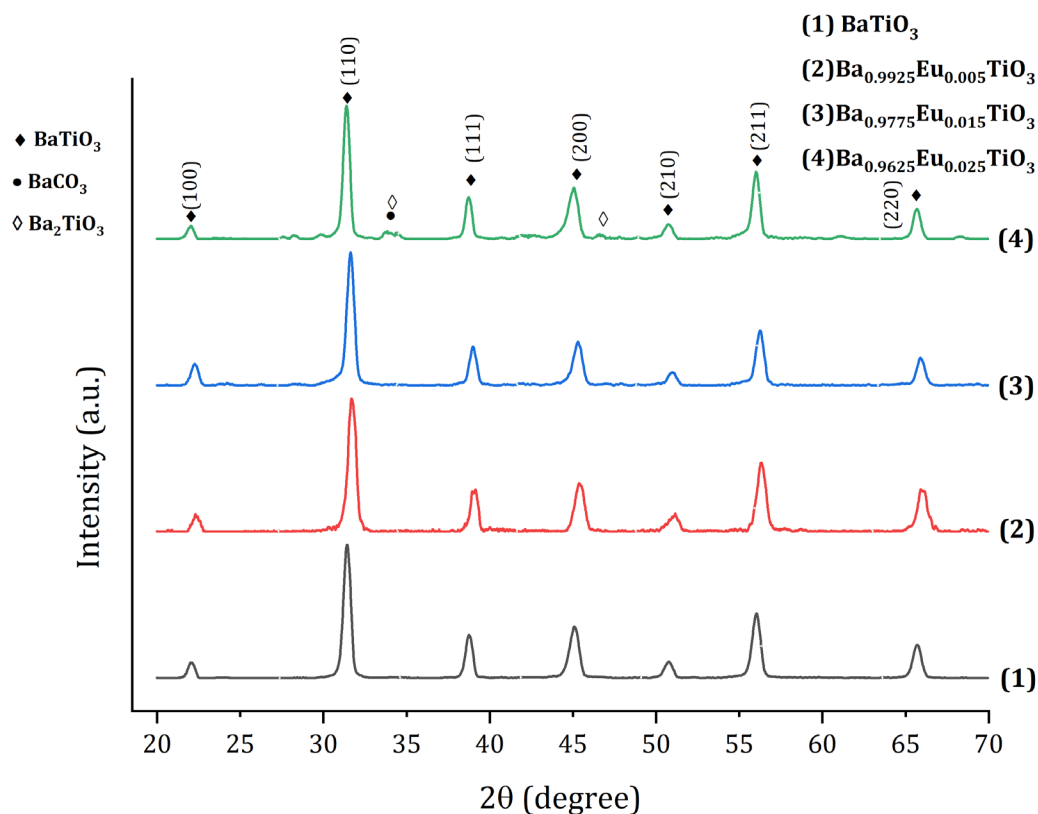

**Figure S1.** Powder X-ray diffraction pattern of pure and Eu-doped barium titanate filler particles.

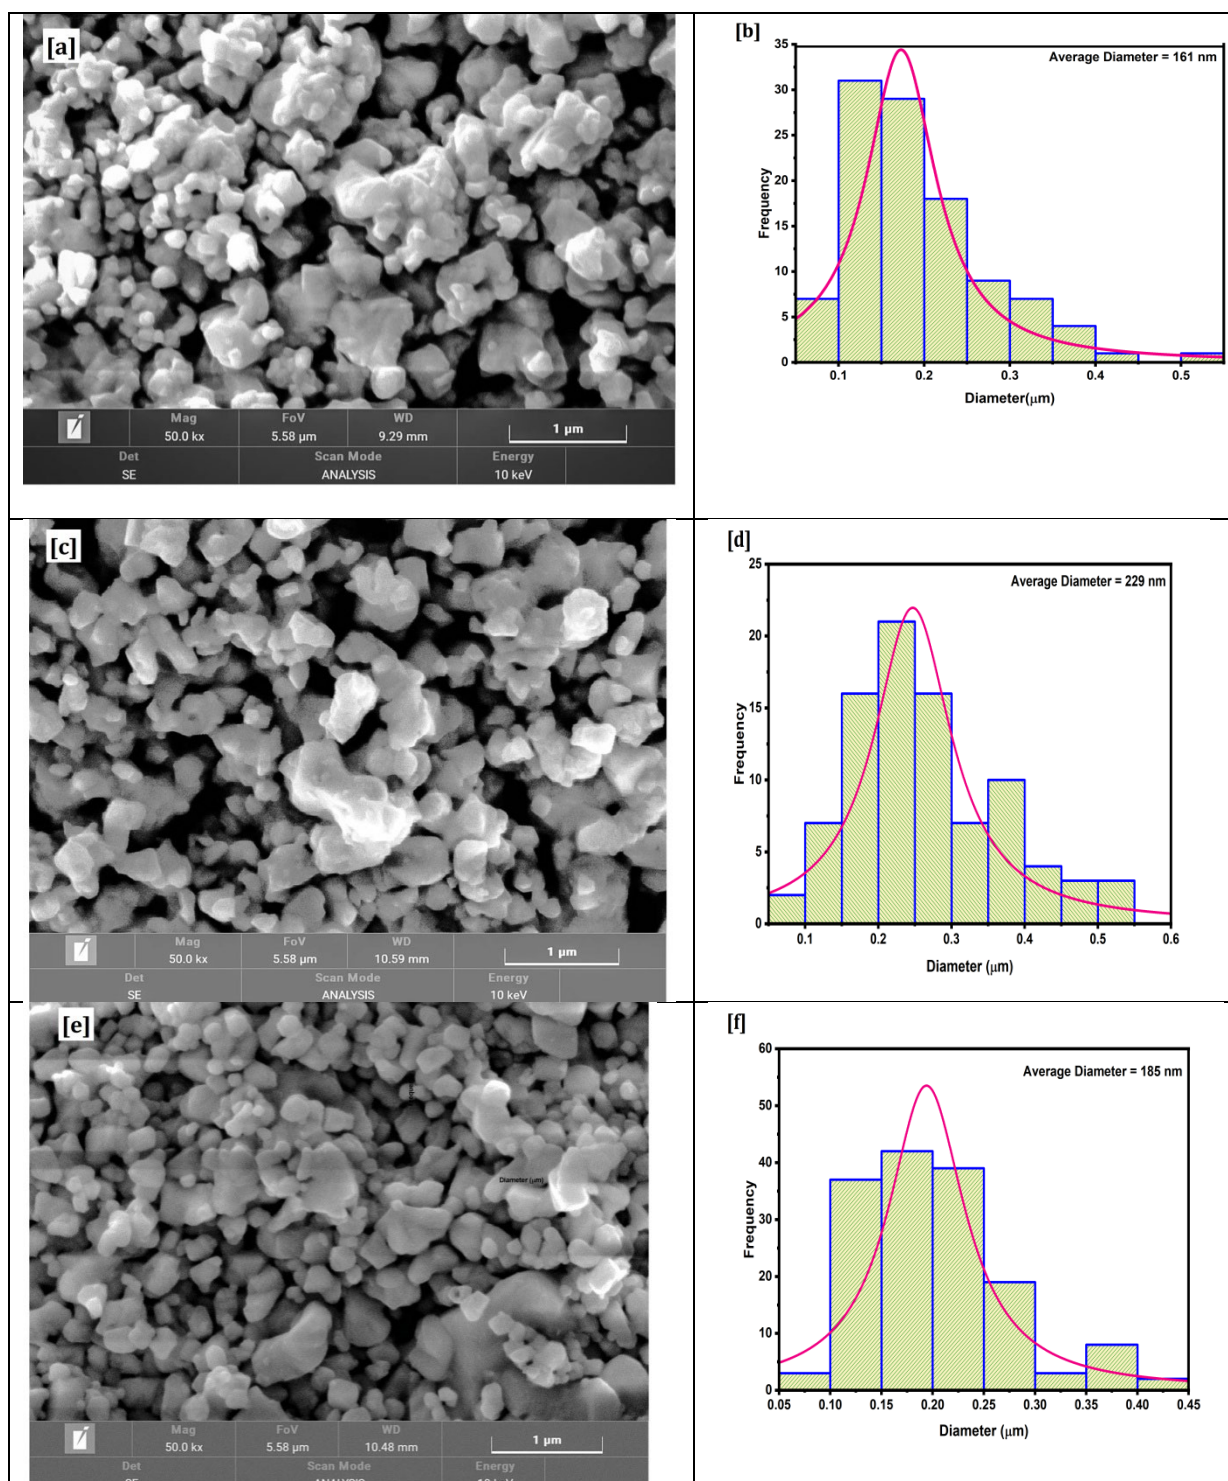

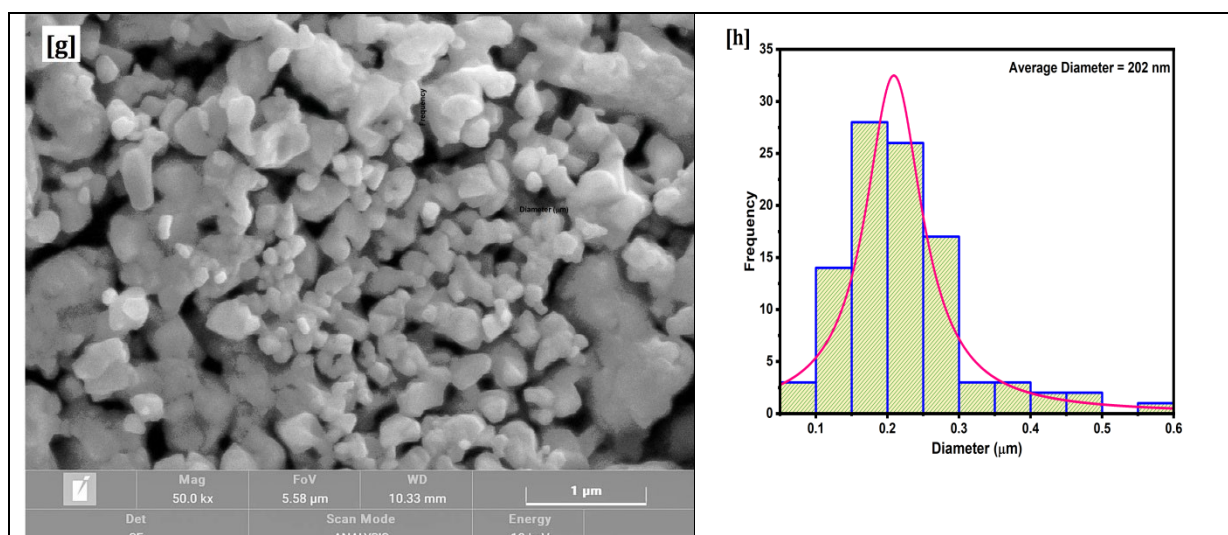

**Figure S2.** FE-SEM micrographs of and particle size distribution (a, b)  $\text{BaTiO}_3$  (c, d)  $\text{BaTiO}_3\text{:}0.5\%\text{Eu}$  (e, f)  $\text{BaTiO}_3\text{:}1.5\%\text{Eu}$  (g, h)  $\text{BaTiO}_3\text{:}2.5\%\text{Eu}$ .
